# Supplementary material for: Aromaticity in P8 allotropes and (CH)8 analogues: significance of their 40 valence electrons?
Source: Royal Society of Chemistry journal article supplement (doi:10.1039/d3cp00147d), 2023-01-01
Supplement: d3cp00147d2.pdf [file d3cp00147d2.pdf]

## Aromaticity in P<sub>8</sub> Allotropes and (CH)<sub>8</sub> Analogues: Significance of their 40 Valence Electrons?

Amr A. A. Attia,<sup>1</sup> Alvaro Muñoz-Castro,<sup>\*2</sup> Alexandru Lupan,<sup>\*1</sup> and R. Bruce King<sup>\*3</sup>

<sup>1</sup>*Faculty of Chemistry and Chemical Engineering, Babeş-Bolyai University, Cluj-Napoca, Romania*

<sup>2</sup>*Laboratorio de Química Inorgánica y Materiales Moleculares, Facultad de Ingeniería, Universidad Autónoma de Chile, El Llano Subercaseaux 2801, Santiago, Chile*

<sup>3</sup>*Department of Chemistry, University of Georgia, Athens, Georgia, 30602, USA*

### Supporting Information

Complete Gaussian09 Reference.

Table S1: Initial 8-vertex starting structures.

Table S2: Distance matrices and energy rankings for the lowest energy P<sub>8</sub> structures.

Table S3: Distance matrices and energy rankings for the lowest energy C<sub>8</sub>H<sub>8</sub> structures.

Table S4: Orbital energies and HOMO-LUMO gaps for the lowest lying P<sub>8</sub> and C<sub>8</sub>H<sub>8</sub> structures.

Table S5: QTAIM analysis for the lowest lying P<sub>8</sub> structures.

Table S6: Calculated molar magnetic susceptibility in cgs ppm units (10<sup>-6</sup> cm<sup>3</sup> mol<sup>-1</sup>) for the lowest lying P<sub>8</sub> and C<sub>8</sub>H<sub>8</sub> structures.

Figure S1: Correlation between the calculated  $\chi_M$  and relative energy (kcal/mol) for the lowest lying P<sub>8</sub> and C<sub>8</sub>H<sub>8</sub> structures.

Complete Gaussian09 Reference.

Gaussian 09, Revision E.01, M. J. Frisch, G. W. Trucks, H. B. Schlegel, G. E. Scuseria, M. A. Robb, J. R. Cheeseman, G. Scalmani, V. Barone, B. Mennucci, G. A. Petersson, H. Nakatsuji, M. Caricato, X. Li, H. P. Hratchian, A. F. Izmaylov, J. Bloino, G. Zheng, J. L. Sonnenberg, M. Hada, M. Ehara, K. Toyota, R. Fukuda, J. Hasegawa, M. Ishida, T. Nakajima, Y. Honda, O. Kitao, H. Nakai, T. Vreven, J. A. Montgomery, Jr., J. E. Peralta, F. Ogliaro, M. Bearpark, J. J. Heyd, E. Brothers, K. N. Kudin, V. N. Staroverov, R. Kobayashi, J. Normand, K. Raghavachari, A. Rendell, J. C. Burant, S. S. Iyengar, J. Tomasi, M. Cossi, N. Rega, J. M. Millam, M. Klene, J. E. Knox, J. B. Cross, V. Bakken, C. Adamo, J. Jaramillo, R. Gomperts, R. E. Stratmann, O. Yazyev, A. J. Austin, R. Cammi, C. Pomelli, J. W. Ochterski, R. L. Martin, K. Morokuma, V. G. Zakrzewski, G. A. Voth, P. Salvador, J. J. Dannenberg, S. Dapprich, A. D. Daniels, O. Farkas, J. B. Foresman, J. V. Ortiz, J. Cioslowski, and D. J. Fox, Gaussian, Inc., Wallingford CT, 2016.

Table S1: Initial 8-vertex polyhedra upon which the starting structures are based.

|                                                                                                                                               |                                                                                                                             |                                                                                                                                            |
|-----------------------------------------------------------------------------------------------------------------------------------------------|-----------------------------------------------------------------------------------------------------------------------------|--------------------------------------------------------------------------------------------------------------------------------------------|
| 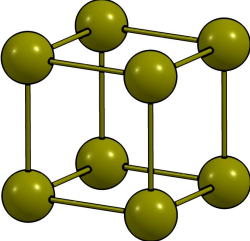 <p>1. Cube</p>                                              |  <p>2. Antiprism</p>                       |  <p>3. Trigonal Prism</p>                               |
|  <p>4. Trigonal Antiprism</p>                                |  <p>5. Bisdisphenoid</p>                   |  <p>6. Hexagonal bipyramid</p>                          |
|  <p>7. All-capped tetrahedron</p>                           |  <p>8. Nido structure</p>                 |  <p>9. Diccapped trigonal prism (<math>C_s</math>)</p> |
|  <p>10. Diccapped trigonal prism (<math>C_{2v}</math>)</p> |  <p>11. Diccapped octahedron</p>         |  <p>12. Bicyclooctatriene</p>                         |
|  <p>13. Cyclooctatetraene (planar)</p>                     |  <p>14. <i>cis</i>-Tricyclooctadiene</p> |  <p>15. Cyclooctatetraene (non-planar)</p>            |
|  <p>16. <i>trans</i>-Tricyclooctadiene</p>                 |                                                                                                                             |                                                                                                                                            |

Table S2: Distance table for the lowest-lying  $P_8$  optimized structures obtained at the M11/def2-TZVP level of theory. Included are the zero-point corrected absolute energy in (a.u.) at the DLPNO-CCSD(T)/def2-QZVP level of theory with zero-point energy obtained from the M11/def2-TZVP computations, relative energy in (kcal/mol) and symmetry.

|                                                                                                                                  |          |          |          |          |          |          |
|----------------------------------------------------------------------------------------------------------------------------------|----------|----------|----------|----------|----------|----------|
| 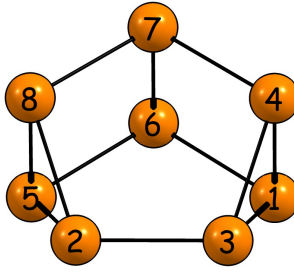 <p>1. -2727.491545 0.0 <math>C_{2v}</math></p> |          | 1        | 2        | 3        | 4        | 5        |
|                                                                                                                                  | 1 P      | 0.000000 |          |          |          |          |
|                                                                                                                                  | 2 P      | 3.548864 | 0.000000 |          |          |          |
|                                                                                                                                  | 3 P      | 2.180490 | 2.210211 | 0.000000 |          |          |
|                                                                                                                                  | 4 P      | 2.280445 | 3.548872 | 2.180495 | 0.000000 |          |
|                                                                                                                                  | 5 P      | 3.547119 | 2.180494 | 3.548862 | 4.216929 | 0.000000 |
|                                                                                                                                  | 6 P      | 2.236614 | 3.466450 | 3.466445 | 3.164638 | 2.236612 |
|                                                                                                                                  | 7 P      | 3.164660 | 3.466451 | 3.466447 | 2.236611 | 3.164649 |
|                                                                                                                                  | 8 P      | 4.216933 | 2.180497 | 3.548865 | 3.547129 | 2.280440 |
|                                                                                                                                  |          | 6        | 7        | 8        |          |          |
| 6 P                                                                                                                              | 0.000000 |          |          |          |          |          |
| 7 P                                                                                                                              | 2.198067 | 0.000000 |          |          |          |          |
| 8 P                                                                                                                              | 3.164643 | 2.236608 | 0.000000 |          |          |          |

|                                                                                                                                  |          |          |          |          |          |          |
|----------------------------------------------------------------------------------------------------------------------------------|----------|----------|----------|----------|----------|----------|
| 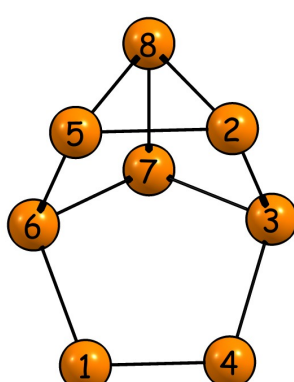 <p>2. -2727.476942 +9.2 <math>C_s</math></p> |          | 1        | 2        | 3        | 4        | 5        |
|                                                                                                                                  | 1 P      | 0.000000 |          |          |          |          |
|                                                                                                                                  | 2 P      | 4.005192 | 0.000000 |          |          |          |
|                                                                                                                                  | 3 P      | 3.404191 | 2.241488 | 0.000000 |          |          |
|                                                                                                                                  | 4 P      | 2.015391 | 3.410715 | 2.206398 | 0.000000 |          |
|                                                                                                                                  | 5 P      | 3.410707 | 2.187033 | 3.509487 | 4.004971 | 0.000000 |
|                                                                                                                                  | 6 P      | 2.206376 | 3.509589 | 3.334449 | 3.404146 | 2.241505 |
|                                                                                                                                  | 7 P      | 3.486326 | 3.218339 | 2.194622 | 3.486344 | 3.218334 |
|                                                                                                                                  | 8 P      | 4.607047 | 2.224056 | 3.009563 | 4.607019 | 2.224064 |
|                                                                                                                                  |          | 6        | 7        | 8        |          |          |
| 6 P                                                                                                                              | 0.000000 |          |          |          |          |          |
| 7 P                                                                                                                              | 2.194625 | 0.000000 |          |          |          |          |
| 8 P                                                                                                                              | 3.009536 | 2.296244 | 0.000000 |          |          |          |

|                             |          |          |          |          |          |          |
|-----------------------------|----------|----------|----------|----------|----------|----------|
|                             | 1        | 2        | 3        | 4        | 5        |          |
|                             | 1 P      | 0.000000 |          |          |          |          |
|                             | 2 P      | 3.879415 | 0.000000 |          |          |          |
|                             | 3 P      | 2.198256 | 3.361203 | 0.000000 |          |          |
|                             | 4 P      | 3.556607 | 3.065659 | 3.446342 | 0.000000 |          |
|                             | 5 P      | 3.556607 | 2.220461 | 2.190181 | 2.207016 | 0.000000 |
|                             | 6 P      | 2.209599 | 4.911601 | 2.203242 | 3.484419 | 3.484419 |
|                             | 7 P      | 3.879415 | 2.024370 | 4.218070 | 2.220461 | 3.065659 |
|                             | 8 P      | 2.198256 | 4.218070 | 3.208124 | 2.190181 | 3.446342 |
|                             |          | 6        | 7        | 8        |          |          |
| 6 P                         | 0.000000 |          |          |          |          |          |
| 7 P                         | 4.911601 | 0.000000 |          |          |          |          |
| 8 P                         | 2.203242 | 3.361203 | 0.000000 |          |          |          |
| 3. -2727.473942 +11.0 $C_s$ |          |          |          |          |          |          |

|                             |          |          |          |          |          |          |
|-----------------------------|----------|----------|----------|----------|----------|----------|
|                             | 1        | 2        | 3        | 4        | 5        |          |
|                             | 1 P      | 0.000000 |          |          |          |          |
|                             | 2 P      | 3.682724 | 0.000000 |          |          |          |
|                             | 3 P      | 4.397099 | 2.128154 | 0.000000 |          |          |
|                             | 4 P      | 2.225681 | 3.428232 | 3.434931 | 0.000000 |          |
|                             | 5 P      | 2.391854 | 2.225643 | 3.550229 | 2.160775 | 0.000000 |
|                             | 6 P      | 2.225681 | 3.428232 | 3.434931 | 3.150228 | 3.547572 |
|                             | 7 P      | 2.391854 | 2.225643 | 3.550229 | 3.547572 | 2.512934 |
|                             | 8 P      | 3.176388 | 3.216579 | 2.103177 | 2.248391 | 3.450144 |
|                             |          | 6        | 7        | 8        |          |          |
| 6 P                         | 0.000000 |          |          |          |          |          |
| 7 P                         | 2.160775 | 0.000000 |          |          |          |          |
| 8 P                         | 2.248391 | 3.450144 | 0.000000 |          |          |          |
| 4. -2727.473615 +11.3 $C_s$ |          |          |          |          |          |          |

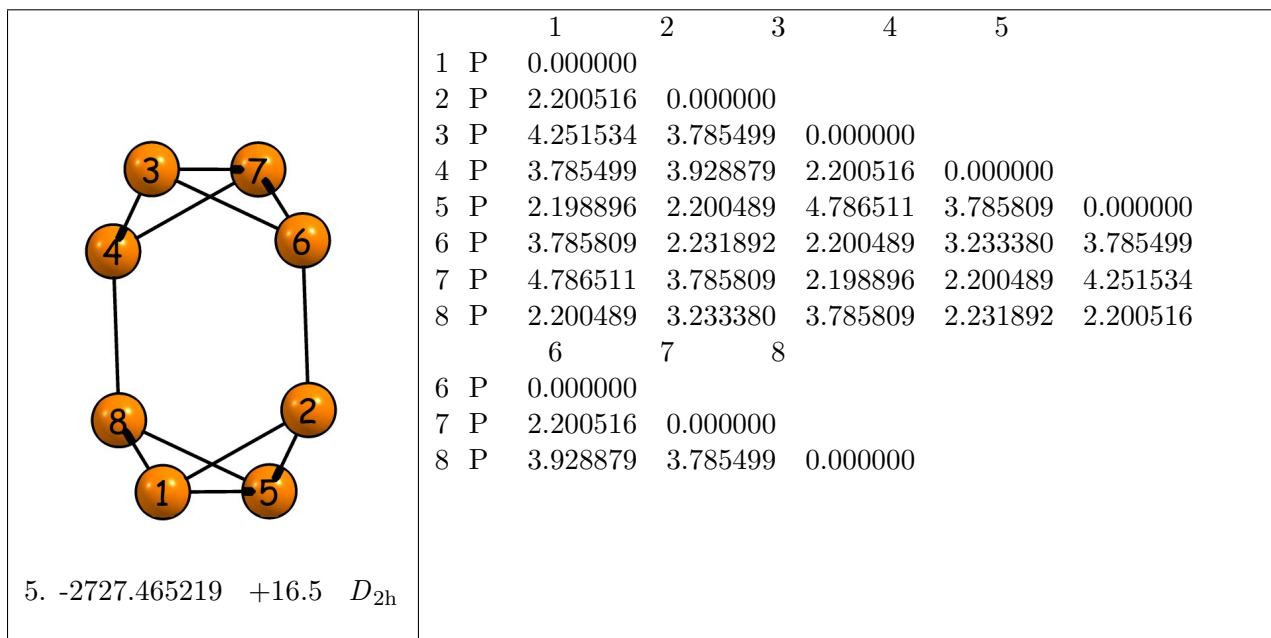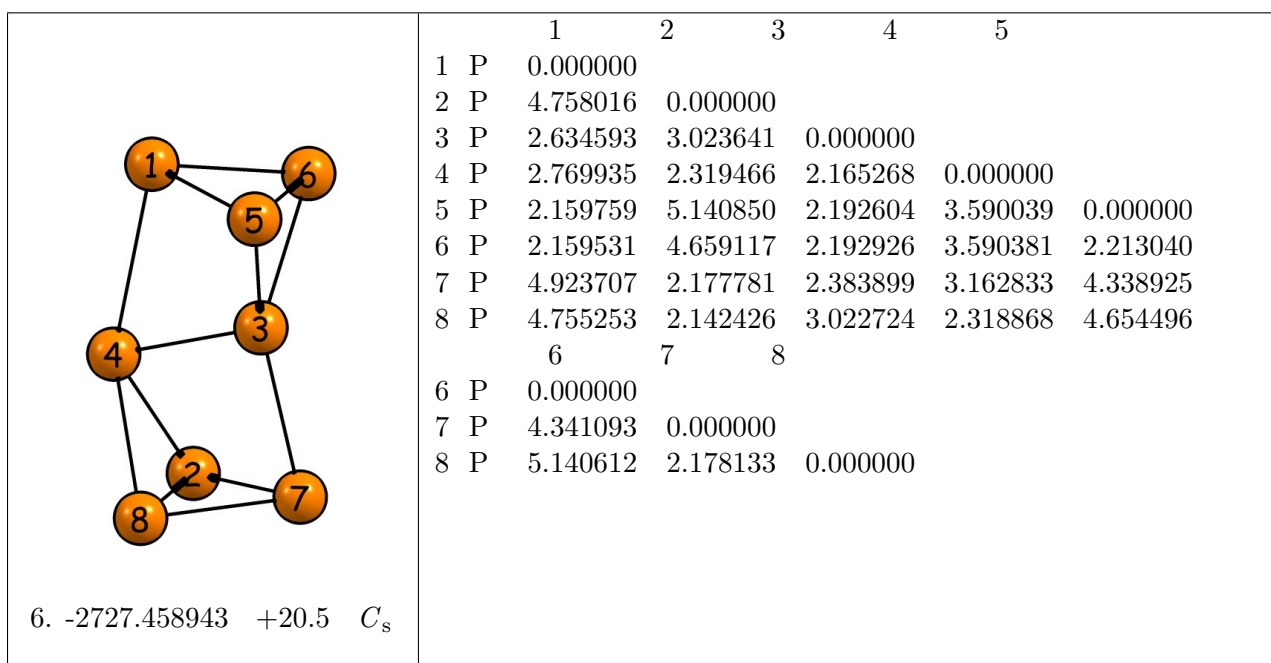

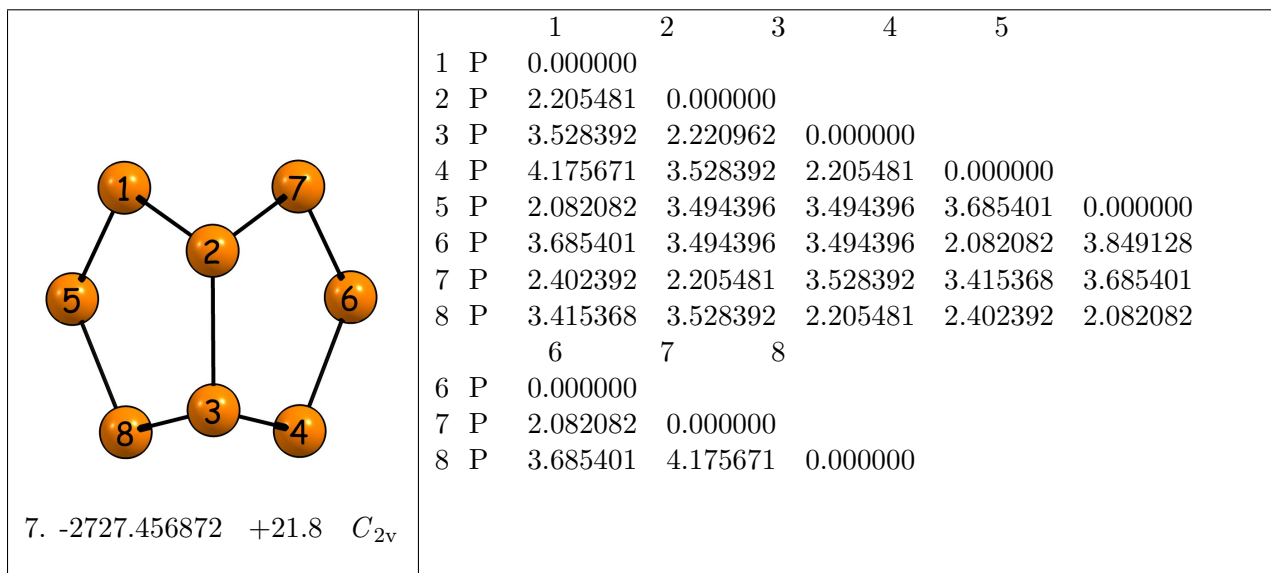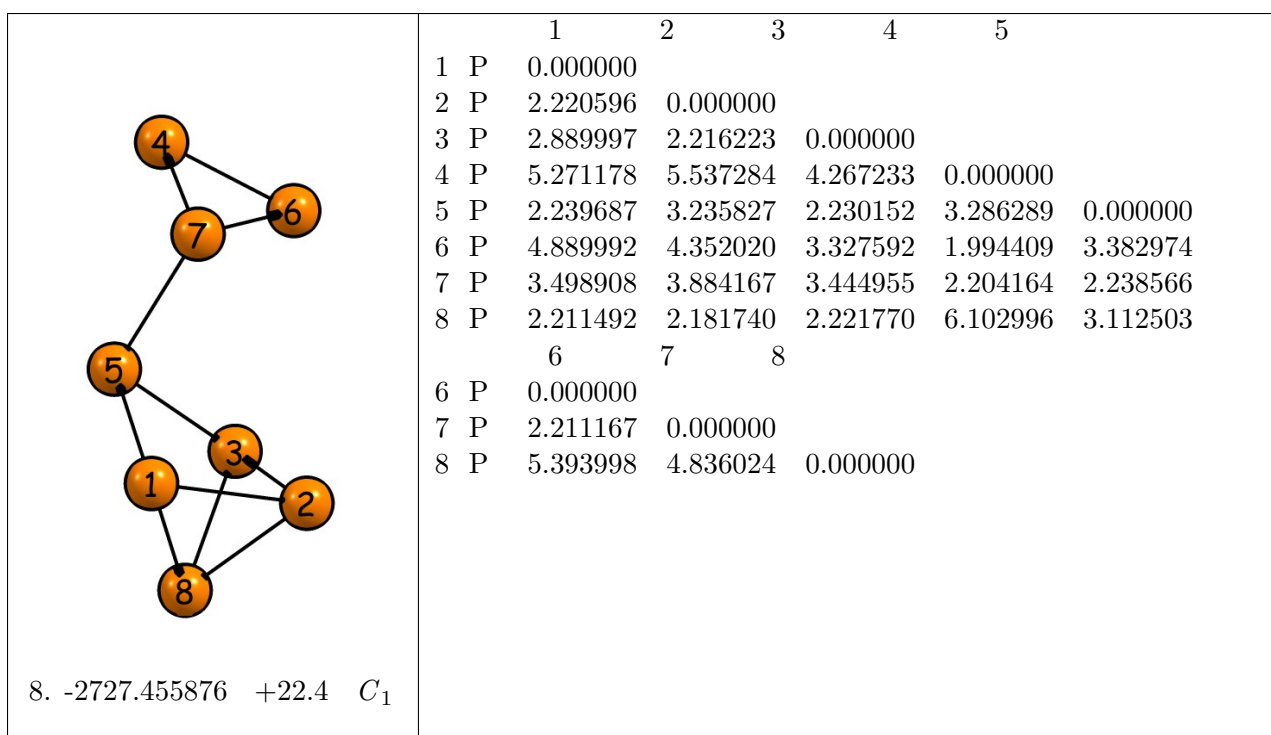

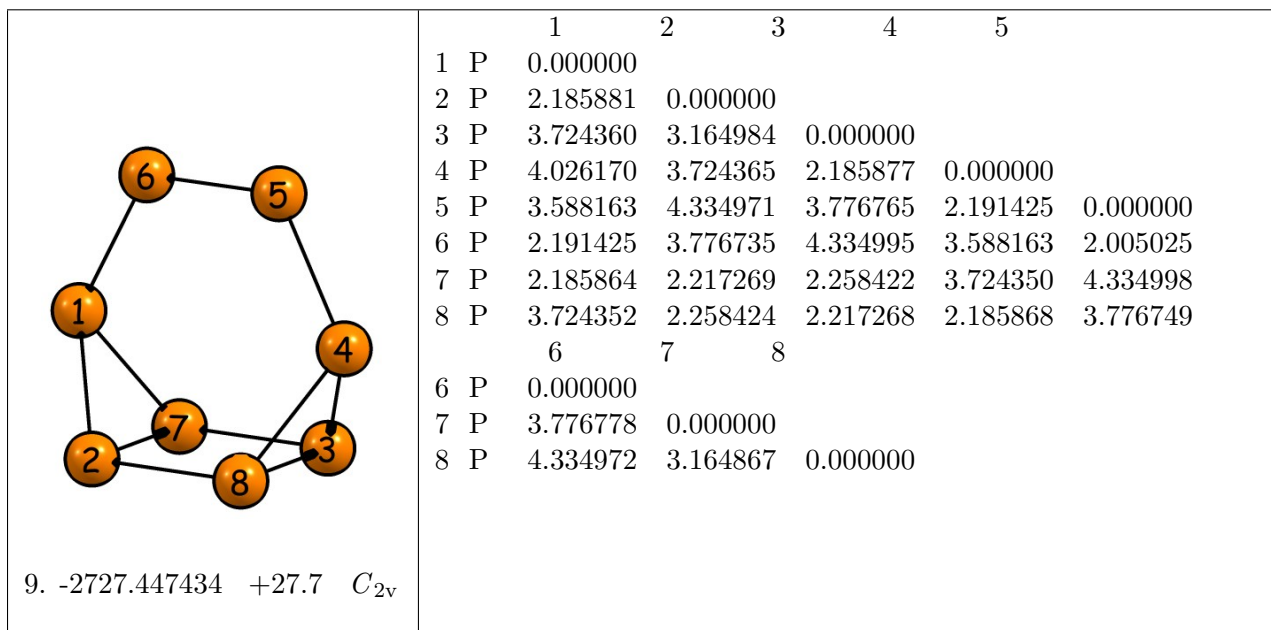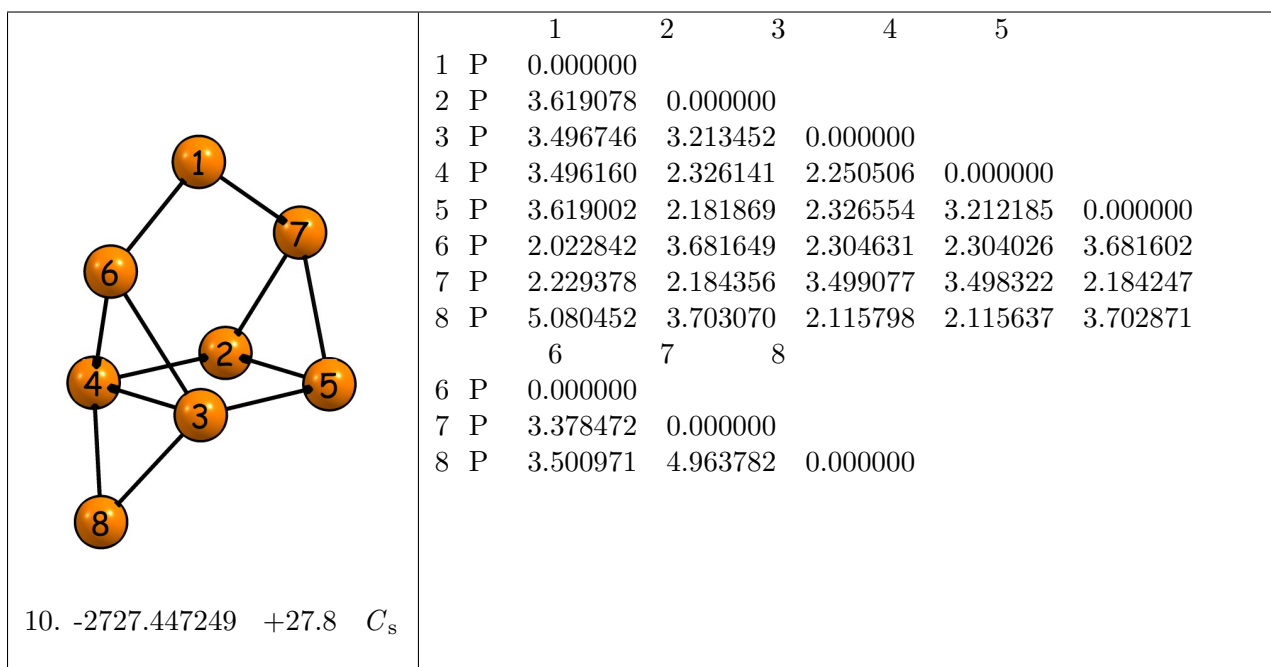



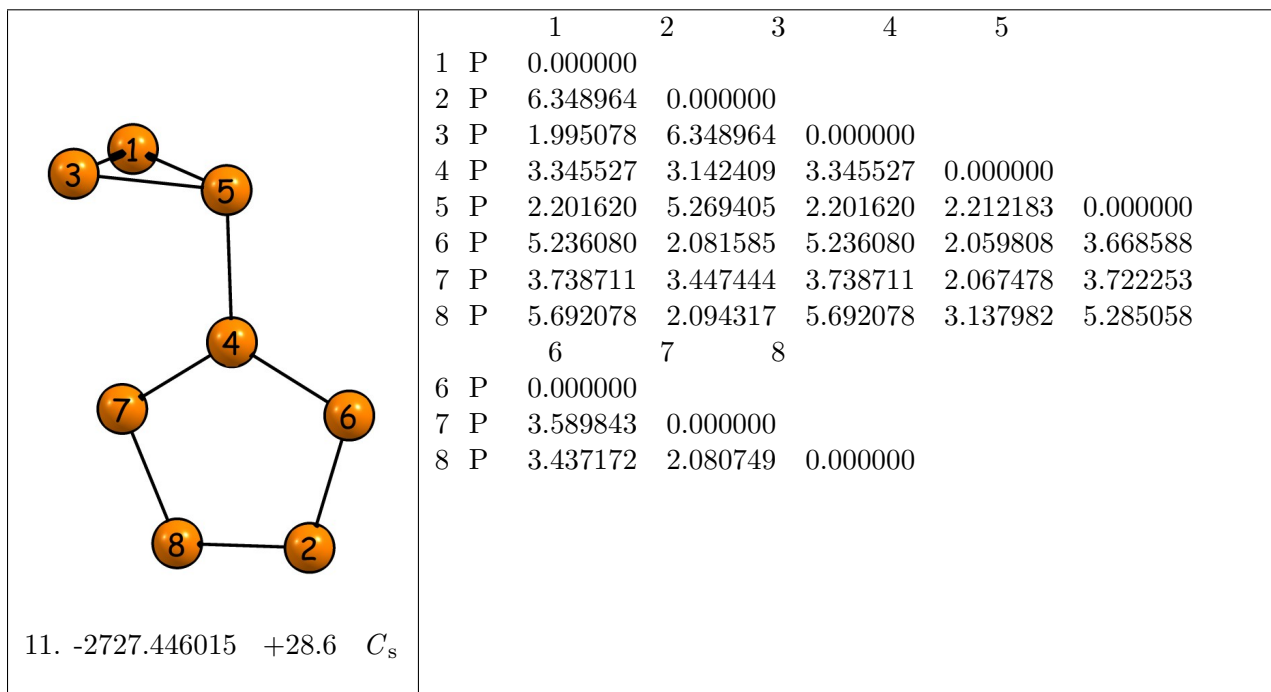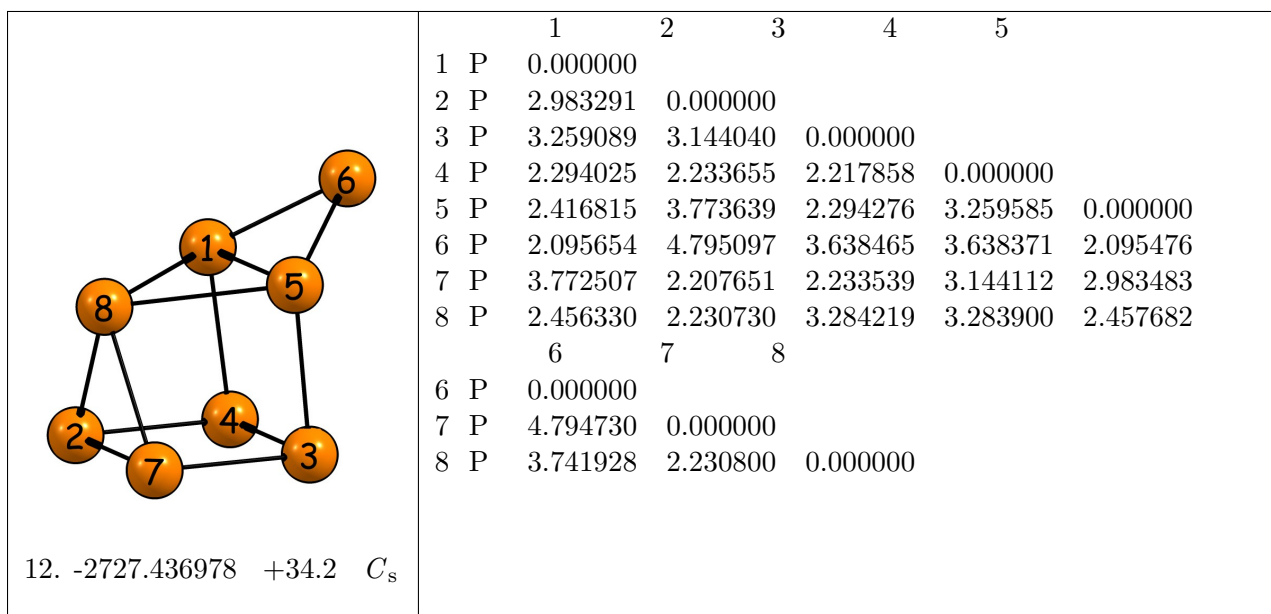

|                                                                                                                                      |          |          |          |          |          |          |
|--------------------------------------------------------------------------------------------------------------------------------------|----------|----------|----------|----------|----------|----------|
| 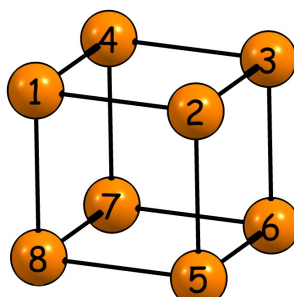 <p>13. -2727.432774 +36.9<br/><math>T_d</math></p> | 1        | 2        | 3        | 4        | 5        |          |
|                                                                                                                                      | 1 P      | 0.000000 |          |          |          |          |
|                                                                                                                                      | 2 P      | 2.264933 | 0.000000 |          |          |          |
|                                                                                                                                      | 3 P      | 3.202774 | 2.264723 | 0.000000 |          |          |
|                                                                                                                                      | 4 P      | 2.264723 | 3.203127 | 2.264933 | 0.000000 |          |
|                                                                                                                                      | 5 P      | 3.203536 | 2.264933 | 3.202774 | 3.922858 | 0.000000 |
|                                                                                                                                      | 6 P      | 3.922858 | 3.203127 | 2.264933 | 3.202662 | 2.264723 |
|                                                                                                                                      | 7 P      | 3.202774 | 3.922858 | 3.203536 | 2.264933 | 3.202774 |
|                                                                                                                                      | 8 P      | 2.264933 | 3.202662 | 3.922858 | 3.203127 | 2.264933 |
|                                                                                                                                      |          | 6        | 7        | 8        |          |          |
| 6 P                                                                                                                                  | 0.000000 |          |          |          |          |          |
| 7 P                                                                                                                                  | 2.264933 | 0.000000 |          |          |          |          |
| 8 P                                                                                                                                  | 3.203127 | 2.264723 | 0.000000 |          |          |          |

Table S3: Distance table for the lowest-lying C<sub>8</sub>H<sub>8</sub> optimized structures obtained at the M11/def2-TZVP level of theory. Included are the zero-point corrected absolute energy in (a.u.) at the DLPNO-CCSD(T)/def2-QZVP level of theory with zero-point energy obtained from the M11/def2-TZVP computations, relative energy in (kcal/mol) and symmetry. H atoms are omitted for clarity

|                                                                                                                            |          |          |          |          |          |          |
|----------------------------------------------------------------------------------------------------------------------------|----------|----------|----------|----------|----------|----------|
| 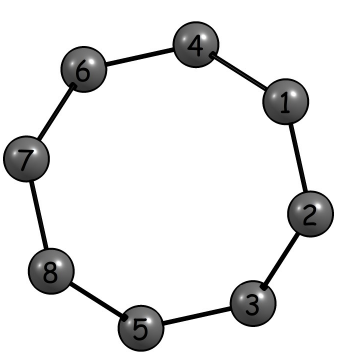 <p>1. -308.955098 0.0 D<sub>2d</sub></p> |          | 1        | 2        | 3        | 4        | 5        |
|                                                                                                                            | 1 C      | 0.000000 |          |          |          |          |
|                                                                                                                            | 2 C      | 1.328183 | 0.000000 |          |          |          |
|                                                                                                                            | 3 C      | 2.499143 | 1.473756 | 0.000000 |          |          |
|                                                                                                                            | 4 C      | 1.473756 | 2.499144 | 3.067169 | 0.000000 |          |
|                                                                                                                            | 5 C      | 3.212394 | 2.499144 | 1.328182 | 3.342393 | 0.000000 |
|                                                                                                                            | 6 C      | 2.499143 | 3.212395 | 3.342393 | 1.328183 | 3.067168 |
|                                                                                                                            | 7 C      | 3.067169 | 3.342394 | 3.212394 | 2.499144 | 2.499143 |
|                                                                                                                            | 8 C      | 3.342393 | 3.067169 | 2.499143 | 3.212395 | 1.473756 |
|                                                                                                                            |          | 6        | 7        | 8        |          |          |
| 6 C                                                                                                                        | 0.000000 |          |          |          |          |          |
| 7 C                                                                                                                        | 1.473756 | 0.000000 |          |          |          |          |
| 8 C                                                                                                                        | 2.499143 | 1.328182 | 0.000000 |          |          |          |

|                                                                                                                              |          |          |          |          |          |          |
|------------------------------------------------------------------------------------------------------------------------------|----------|----------|----------|----------|----------|----------|
| 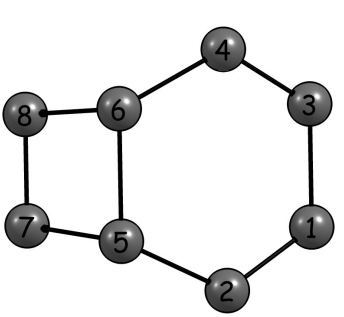 <p>2. -308.942539 +7.9 C<sub>s</sub></p> |          | 1        | 2        | 3        | 4        | 5        |
|                                                                                                                              | 1 C      | 0.000000 |          |          |          |          |
|                                                                                                                              | 2 C      | 1.329682 | 0.000000 |          |          |          |
|                                                                                                                              | 3 C      | 1.467354 | 2.446565 | 0.000000 |          |          |
|                                                                                                                              | 4 C      | 2.446565 | 2.874307 | 1.329682 | 0.000000 |          |
|                                                                                                                              | 5 C      | 2.479400 | 1.499065 | 2.908740 | 2.603584 | 0.000000 |
|                                                                                                                              | 6 C      | 2.908739 | 2.603584 | 2.479400 | 1.499065 | 1.576538 |
|                                                                                                                              | 7 C      | 3.386879 | 2.541760 | 3.663375 | 3.206093 | 1.520105 |
|                                                                                                                              | 8 C      | 3.663374 | 3.206093 | 3.386880 | 2.541761 | 2.098840 |
|                                                                                                                              |          | 6        | 7        | 8        |          |          |
| 6 C                                                                                                                          | 0.000000 |          |          |          |          |          |
| 7 C                                                                                                                          | 2.098841 | 0.000000 |          |          |          |          |
| 8 C                                                                                                                          | 1.520105 | 1.328488 | 0.000000 |          |          |          |

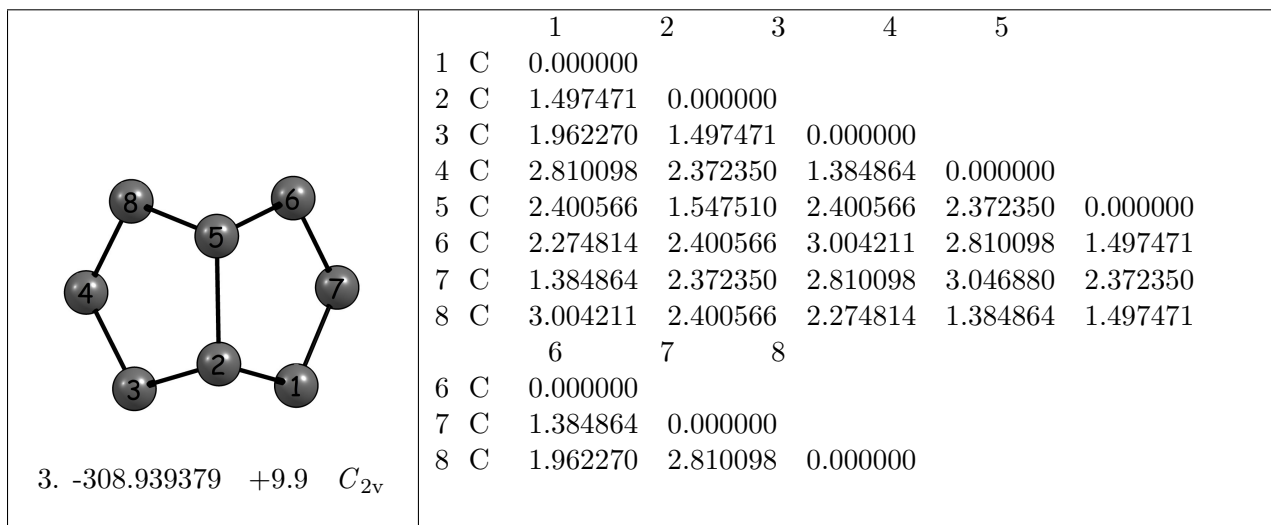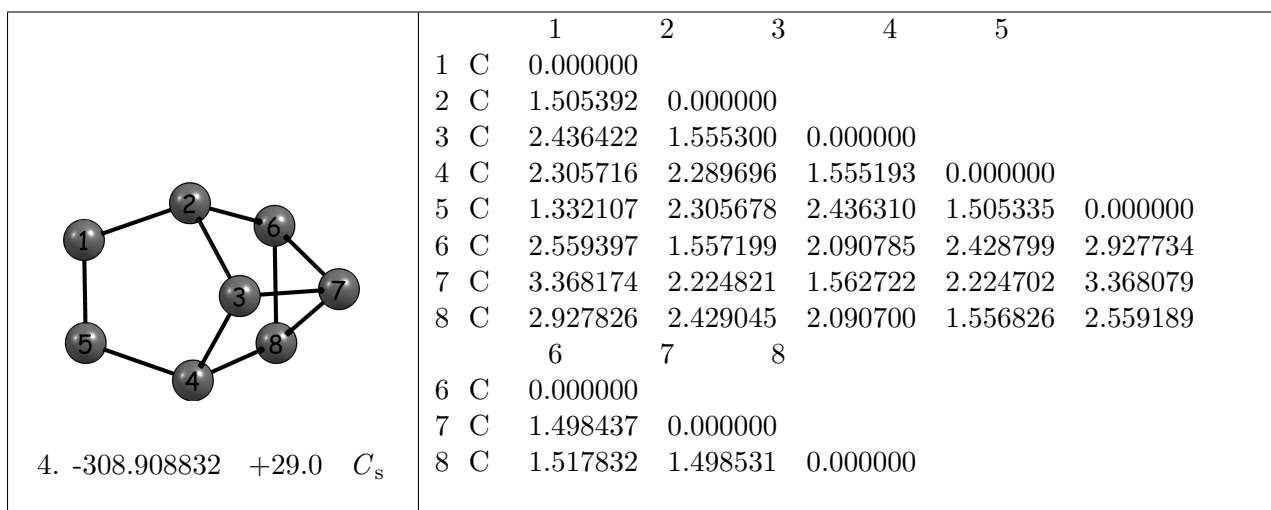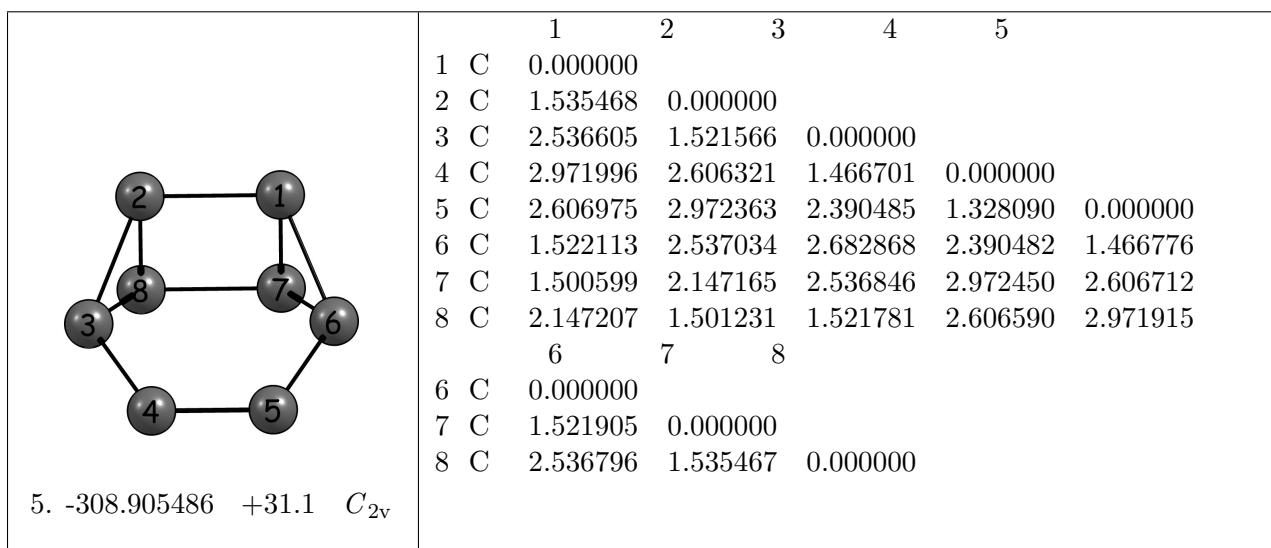

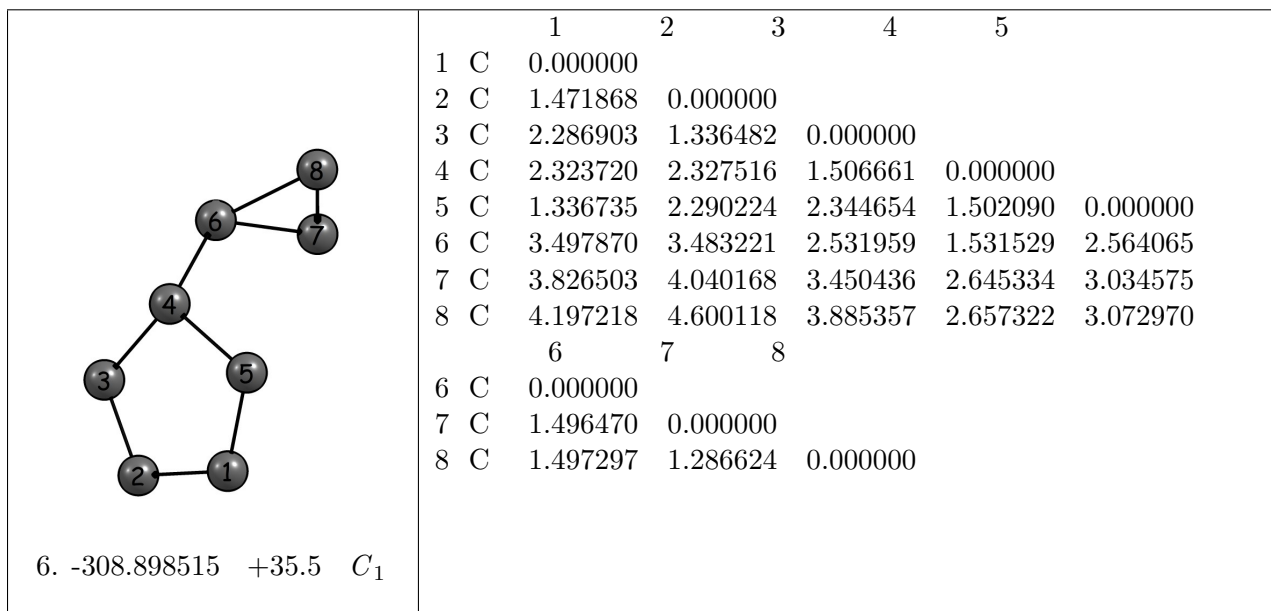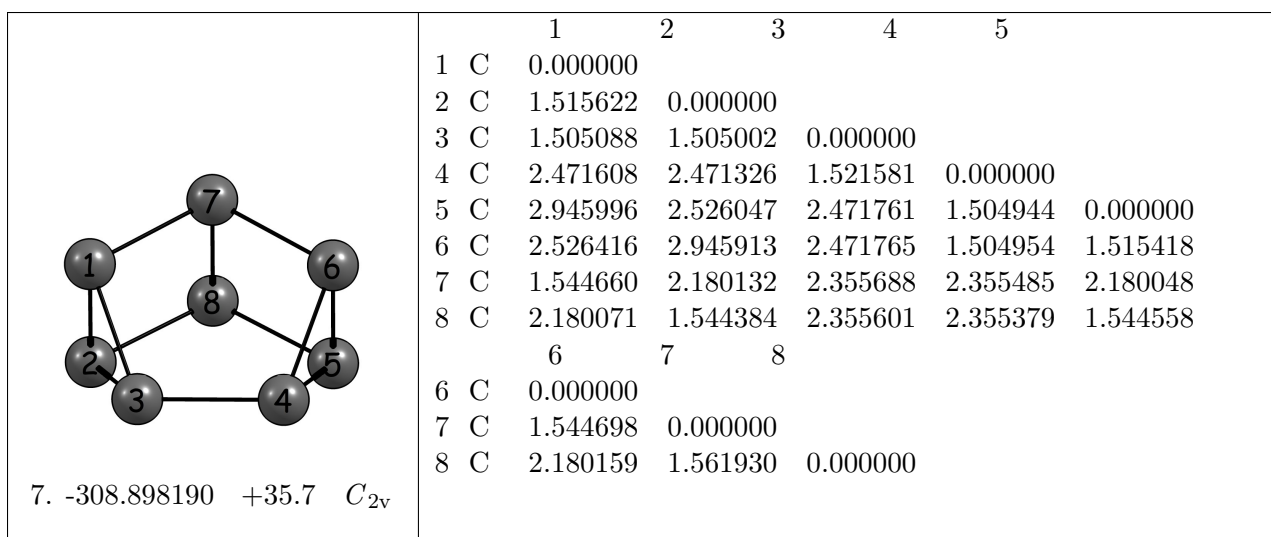

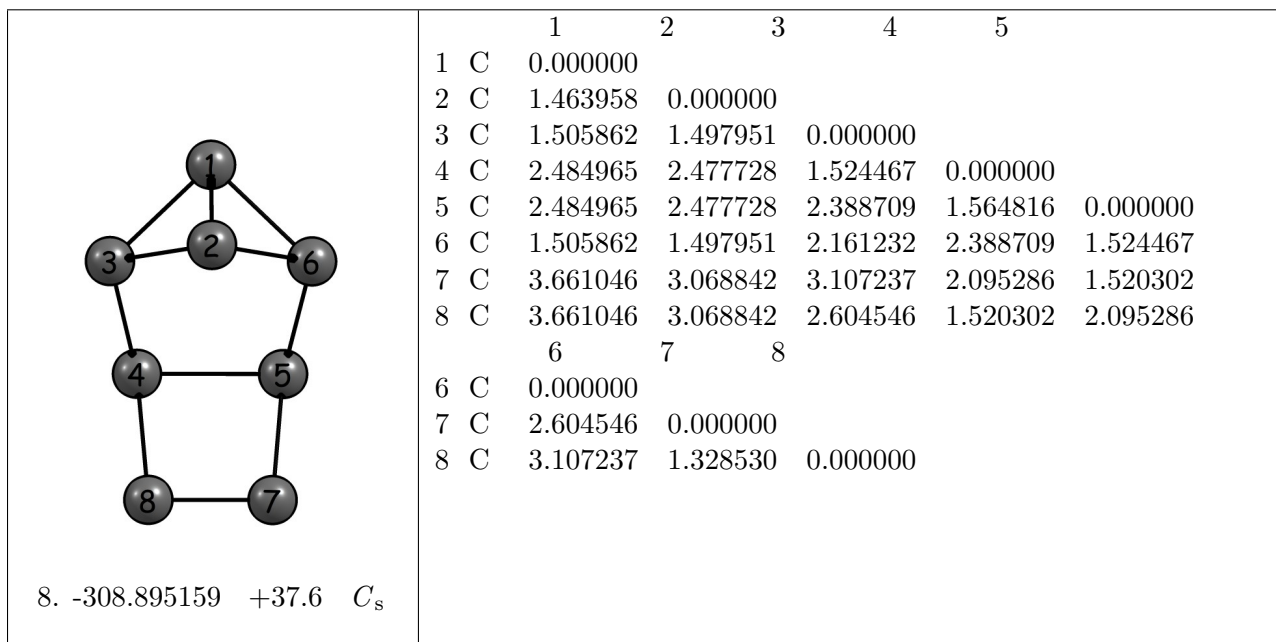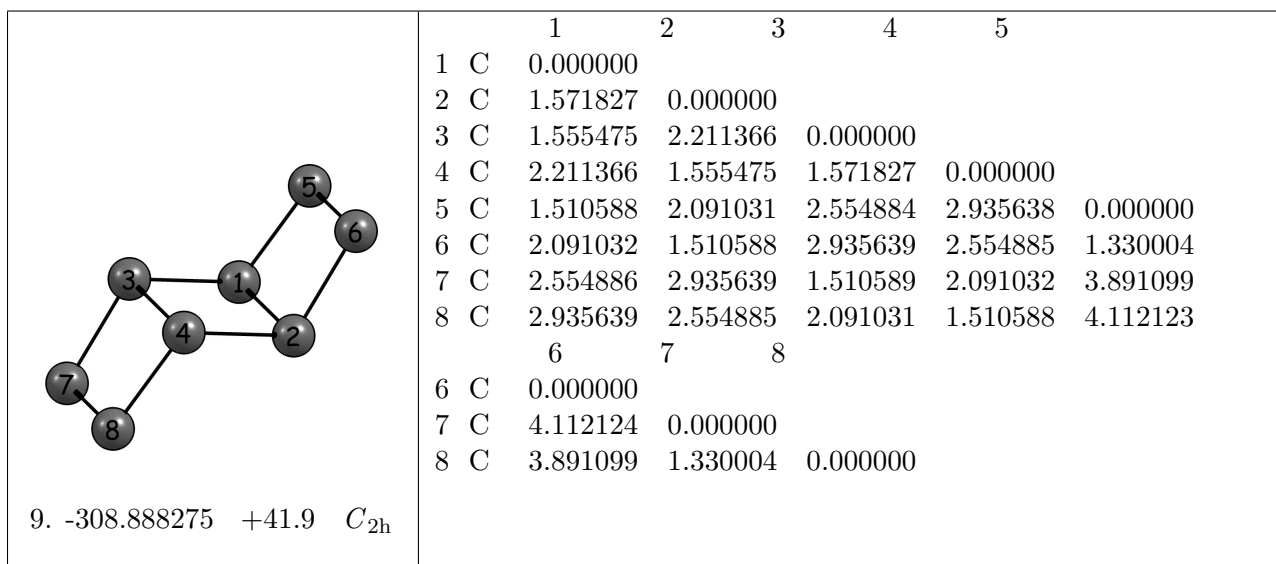

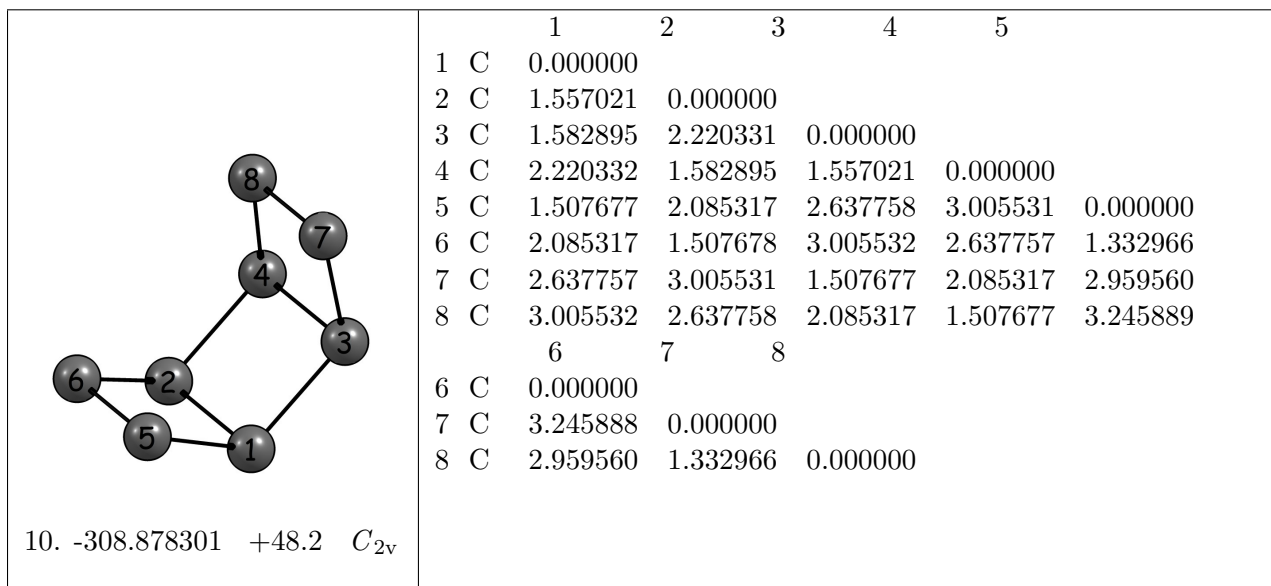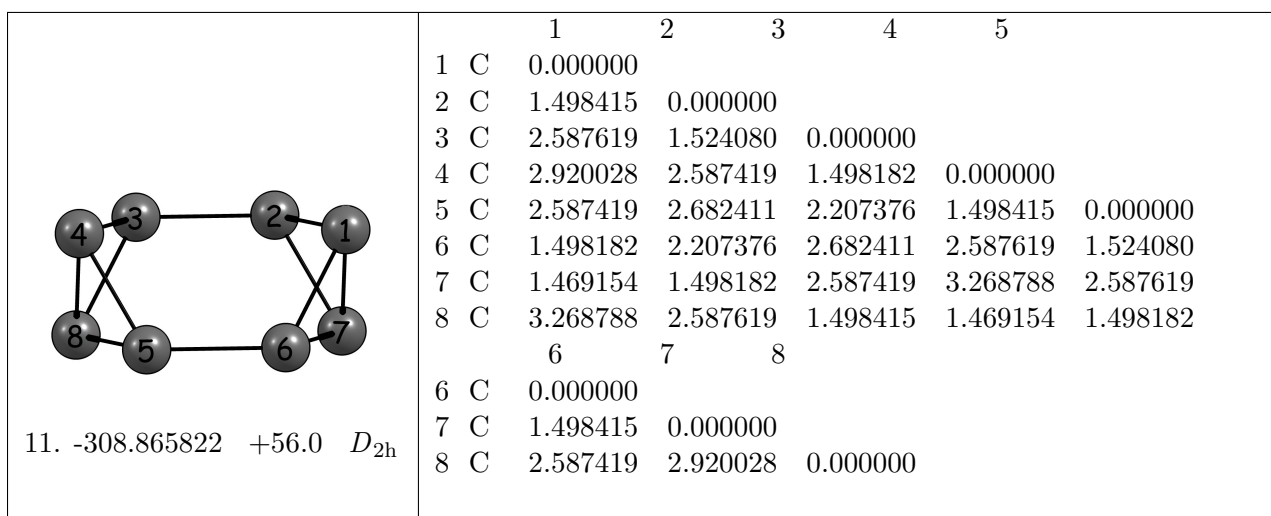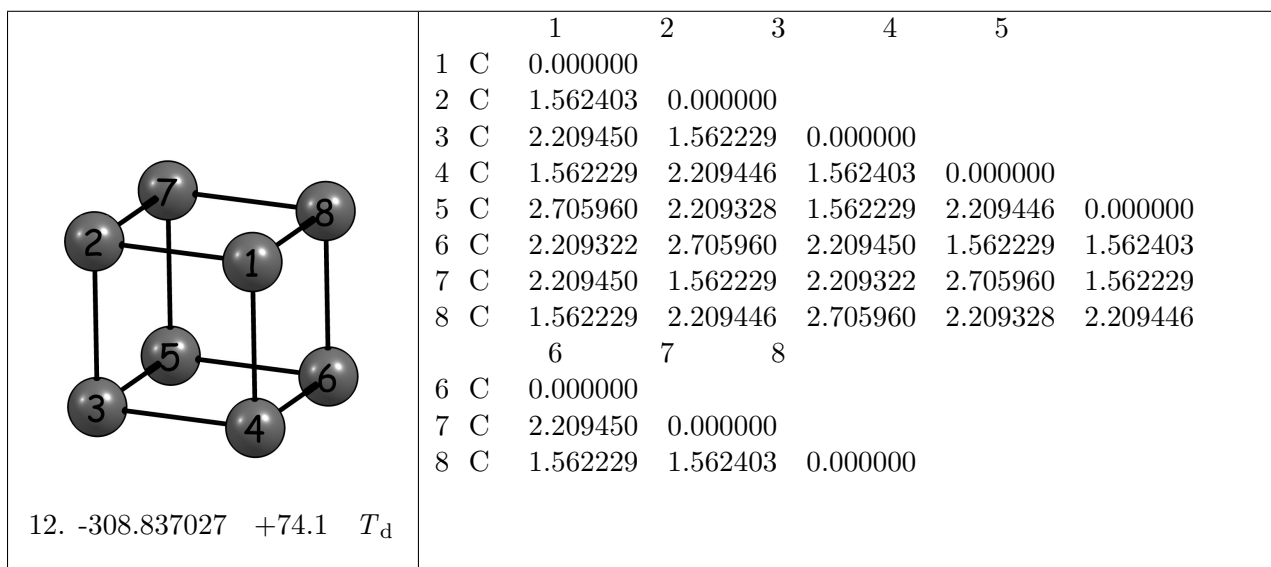

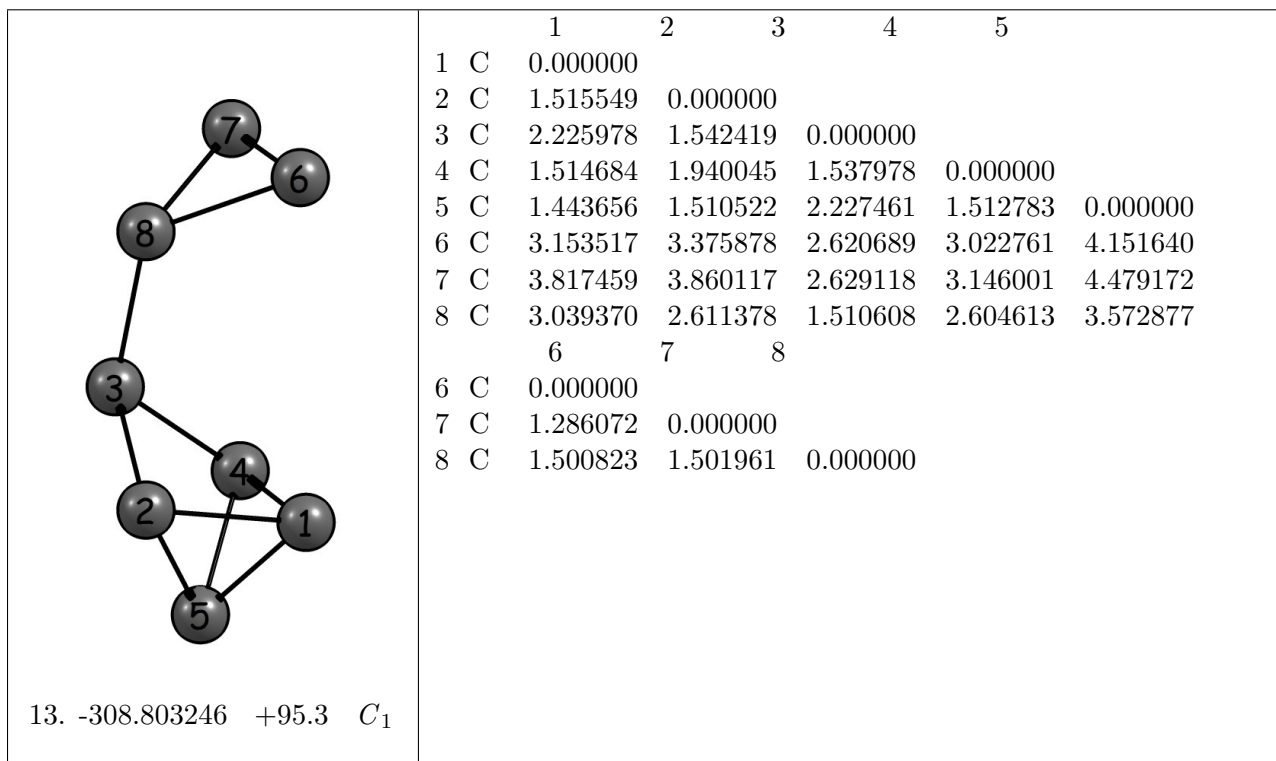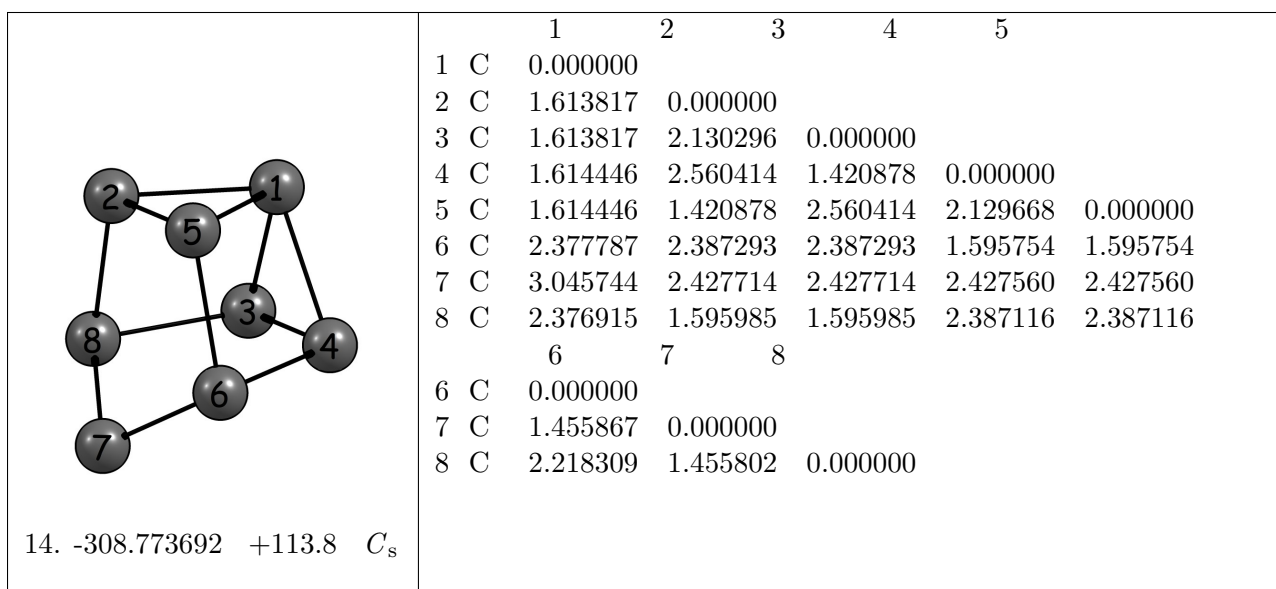



Table S4: HOMO-LUMO gaps for the lowest-lying structures at the M11/def2-TZVP level of theory.

| Structure | HOMO (a.u.) | LUMO (a.u.) | H/L gap (a.u.) | H/L gap (eV) |
|-----------|-------------|-------------|----------------|--------------|
| C8H8-1    | -0.315898   | 0.030773    | 0.346671       | 9.43         |
| C8H8-2    | -0.309530   | 0.044760    | 0.354290       | 9.64         |
| C8H8-3    | -0.293892   | 0.079567    | 0.373459       | 10.16        |
| C8H8-4    | -0.338868   | 0.081737    | 0.420605       | 11.45        |
| C8H8-5    | -0.315435   | 0.093390    | 0.408825       | 11.12        |
| C8H8-6    | -0.316555   | 0.056530    | 0.373085       | 10.15        |
| C8H8-7    | -0.344320   | 0.110697    | 0.455017       | 12.38        |
| C8H8-8    | -0.333994   | 0.090825    | 0.424819       | 11.56        |
| C8H8-9    | -0.335069   | 0.077562    | 0.412631       | 11.23        |
| C8H8-10   | -0.341370   | 0.075014    | 0.416384       | 11.33        |
| C8H8-11   | -0.319572   | 0.110094    | 0.429666       | 11.69        |
| C8H8-12   | -0.354960   | 0.116205    | 0.471165       | 12.82        |
| C8H8-13   | -0.329993   | 0.084032    | 0.414025       | 11.27        |
| C8H8-14   | -0.201368   | 0.082285    | 0.283653       | 7.72         |
| P8-1      | -0.307112   | -0.034318   | 0.272794       | 7.42         |
| P8-2      | -0.329071   | -0.070062   | 0.259009       | 7.05         |
| P8-3      | -0.325684   | -0.058883   | 0.266801       | 7.26         |
| P8-4      | -0.298353   | -0.033674   | 0.264679       | 7.20         |
| P8-5      | -0.311281   | -0.028855   | 0.282426       | 7.69         |
| P8-6      | -0.290550   | -0.004223   | 0.286327       | 7.79         |
| P8-7      | -0.317724   | -0.091970   | 0.225754       | 6.14         |
| P8-8      | -0.307449   | -0.054637   | 0.252812       | 6.88         |
| P8-9      | -0.325472   | -0.067391   | 0.258081       | 7.02         |
| P8-10     | -0.306154   | -0.064388   | 0.241766       | 6.58         |
| P8-11     | -0.324445   | -0.071090   | 0.253355       | 6.89         |
| P8-12     | -0.301829   | -0.052821   | 0.249008       | 6.78         |
| P8-13     | -0.297076   | -0.052037   | 0.245039       | 6.67         |

Table S5: QTAIM analysis for the lowest-lying P<sub>8</sub> structures.

| Structure                            | N° P-Atom | N° P'-Atom | Distance (Å) | Nalewajski-Mrozek BO | BCP Rho | BCP-Laplacian |
|--------------------------------------|-----------|------------|--------------|----------------------|---------|---------------|
| P-P (P <sub>2</sub> H <sub>4</sub> ) | 1         | 2          | 2.264        | 1.05                 | 0.1037  | -0.1119       |
| P=P (P <sub>2</sub> H <sub>2</sub> ) | 1         | 2          | 2.046        | 2.05                 | 0.1427  | -0.2041       |
| P8-1                                 | 1         | 3          | 2.180        | 0.99                 | 0.1107  | -0.0923       |
|                                      | 1         | 4          | 2.280        | 0.96                 | 0.0956  | -0.0517       |
|                                      | 1         | 6          | 2.237        | 0.97                 | 0.1071  | -0.1061       |
|                                      | 2         | 3          | 2.210        | 0.99                 | 0.1082  | -0.1081       |
|                                      | 2         | 5          | 2.180        | 0.99                 | 0.1107  | -0.0923       |
|                                      | 2         | 8          | 2.180        | 0.99                 | 0.1107  | -0.0923       |
|                                      | 3         | 4          | 2.180        | 0.99                 | 0.1107  | -0.0923       |
|                                      | 4         | 7          | 2.237        | 0.97                 | 0.1071  | -0.1061       |
|                                      | 5         | 6          | 2.237        | 0.97                 | 0.1071  | -0.1061       |
|                                      | 5         | 8          | 2.280        | 0.96                 | 0.0956  | -0.0517       |
| P8-2                                 | 6         | 7          | 2.198        | 1.02                 | 0.1162  | -0.1364       |
|                                      | 7         | 8          | 2.237        | 0.97                 | 0.1071  | -0.1061       |
|                                      | 1         | 4          | 2.015        | 1.84                 | 0.1470  | -0.2107       |
|                                      | 1         | 6          | 2.206        | 1.02                 | 0.1114  | -0.1152       |
|                                      | 2         | 3          | 2.241        | 0.92                 | 0.1028  | -0.0893       |
|                                      | 2         | 5          | 2.187        | 1.00                 | 0.1103  | -0.0868       |
|                                      | 2         | 8          | 2.224        | 0.98                 | 0.1052  | -0.0784       |
|                                      | 3         | 4          | 2.206        | 1.02                 | 0.1114  | -0.1152       |
|                                      | 3         | 7          | 2.195        | 0.99                 | 0.1145  | -0.1248       |
|                                      | 5         | 6          | 2.242        | 0.92                 | 0.1028  | -0.0893       |
| P8-3                                 | 5         | 8          | 2.224        | 0.98                 | 0.1052  | -0.0783       |
|                                      | 6         | 7          | 2.195        | 0.99                 | 0.1145  | -0.1248       |
|                                      | 7         | 8          | 2.296        | 0.92                 | 0.0979  | -0.0828       |
|                                      | 1         | 3          | 2.198        | 0.96                 | 0.1084  | -0.0833       |
|                                      | 1         | 6          | 2.210        | 0.95                 | 0.1030  | -0.0461       |
|                                      | 1         | 8          | 2.198        | 0.96                 | 0.1084  | -0.0833       |
|                                      | 2         | 5          | 2.220        | 1.01                 | 0.1100  | -0.1149       |
|                                      | 2         | 7          | 2.024        | 1.82                 | 0.1477  | -0.2162       |
|                                      | 3         | 5          | 2.190        | 1.00                 | 0.1129  | -0.1184       |
|                                      | 3         | 6          | 2.203        | 0.98                 | 0.1078  | -0.0837       |
| P8-4                                 | 4         | 5          | 2.207        | 0.96                 | 0.1120  | -0.1222       |
|                                      | 4         | 7          | 2.220        | 1.01                 | 0.1100  | -0.1149       |
|                                      | 4         | 8          | 2.190        | 1.00                 | 0.1129  | -0.1184       |
|                                      | 6         | 8          | 2.203        | 0.98                 | 0.1078  | -0.0837       |
|                                      | 1         | 4          | 2.226        | 0.90                 | 0.1046  | -0.0770       |
|                                      | 1         | 5          | 2.392        | 0.53                 | 0.0760  | 0.0220        |
|                                      | 1         | 6          | 2.226        | 0.90                 | 0.1046  | -0.0770       |
|                                      | 1         | 7          | 2.392        | 0.53                 | 0.0760  | 0.0220        |
|                                      | 2         | 3          | 2.128        | 1.22                 | 0.1221  | -0.1371       |
|                                      | 2         | 5          | 2.226        | 0.87                 | 0.1036  | -0.0781       |
| P8-5                                 | 2         | 7          | 2.226        | 0.87                 | 0.1036  | -0.0781       |
|                                      | 3         | 8          | 2.103        | 1.24                 | 0.1273  | -0.1537       |
|                                      | 4         | 5          | 2.161        | 1.02                 | 0.1154  | -0.1053       |
|                                      | 4         | 8          | 2.248        | 0.88                 | 0.1039  | -0.0935       |
|                                      | 6         | 7          | 2.161        | 1.02                 | 0.1154  | -0.1053       |
|                                      | 6         | 8          | 2.248        | 0.88                 | 0.1039  | -0.0935       |
|                                      | 1         | 2          | 2.201        | 0.98                 | 0.1076  | -0.0807       |
|                                      | 1         | 5          | 2.199        | 0.95                 | 0.1052  | -0.0541       |
|                                      | 1         | 8          | 2.200        | 0.98                 | 0.1076  | -0.0807       |
|                                      | 2         | 5          | 2.200        | 0.98                 | 0.1076  | -0.0807       |

|       |   |   |       |      |        |         |
|-------|---|---|-------|------|--------|---------|
|       | 4 | 8 | 2.232 | 0.98 | 0.1059 | -0.0977 |
|       | 5 | 8 | 2.201 | 0.98 | 0.1076 | -0.0807 |
|       | 6 | 7 | 2.201 | 0.98 | 0.1076 | -0.0807 |
| P8-6  | 1 | 4 | 2.770 | 0.34 | 0.0433 | 0.0371  |
|       | 1 | 5 | 2.160 | 1.05 | 0.1130 | -0.0856 |
|       | 1 | 6 | 2.160 | 1.05 | 0.1130 | -0.0857 |
|       | 2 | 4 | 2.319 | 0.81 | 0.0885 | -0.0284 |
|       | 2 | 7 | 2.178 | 1.04 | 0.1112 | -0.0824 |
|       | 2 | 8 | 2.142 | 1.02 | 0.1153 | -0.0839 |
|       | 3 | 4 | 2.165 | 0.94 | 0.1220 | -0.1515 |
|       | 3 | 5 | 2.193 | 0.88 | 0.1083 | -0.0776 |
|       | 3 | 6 | 2.193 | 0.88 | 0.1082 | -0.0773 |
|       | 3 | 7 | 2.384 | 0.60 | 0.0821 | -0.0298 |
|       | 4 | 8 | 2.319 | 0.81 | 0.0886 | -0.0287 |
|       | 5 | 6 | 2.213 | 0.98 | 0.1037 | -0.0503 |
|       | 7 | 8 | 2.178 | 1.04 | 0.1112 | -0.0822 |
| P8-7  | 1 | 2 | 2.205 | 0.96 | 0.1079 | -0.0931 |
|       | 1 | 5 | 2.082 | 1.37 | 0.1327 | -0.1723 |
|       | 1 | 7 | 2.402 | 0.61 | 0.0716 | 0.0176  |
|       | 2 | 3 | 2.221 | 0.97 | 0.1078 | -0.1060 |
|       | 2 | 7 | 2.205 | 0.96 | 0.1079 | -0.0931 |
|       | 3 | 4 | 2.205 | 0.96 | 0.1079 | -0.0931 |
|       | 3 | 8 | 2.205 | 0.96 | 0.1079 | -0.0931 |
|       | 4 | 6 | 2.082 | 1.37 | 0.1327 | -0.1723 |
|       | 4 | 8 | 2.402 | 0.61 | 0.0716 | 0.0176  |
|       | 5 | 8 | 2.082 | 1.37 | 0.1327 | -0.1723 |
|       | 6 | 7 | 2.082 | 1.37 | 0.1327 | -0.1723 |
| P8-8  | 1 | 2 | 2.221 | 0.99 | 0.1065 | -0.0825 |
|       | 1 | 5 | 2.240 | 0.97 | 0.1078 | -0.1116 |
|       | 1 | 8 | 2.211 | 0.99 | 0.1072 | -0.0827 |
|       | 2 | 3 | 2.216 | 0.98 | 0.1079 | -0.0875 |
|       | 2 | 8 | 2.182 | 1.00 | 0.1071 | -0.0598 |
|       | 3 | 5 | 2.230 | 0.99 | 0.1100 | -0.1180 |
|       | 3 | 8 | 2.222 | 0.95 | 0.1047 | -0.0757 |
|       | 4 | 6 | 1.994 | 1.86 | 0.1491 | -0.1943 |
|       | 4 | 7 | 2.204 | 1.01 | 0.1069 | -0.0695 |
|       | 5 | 7 | 2.239 | 0.95 | 0.1090 | -0.1112 |
|       | 6 | 7 | 2.211 | 1.01 | 0.1052 | -0.0625 |
| P8-9  | 1 | 2 | 2.186 | 0.95 | 0.1067 | -0.0730 |
|       | 1 | 6 | 2.191 | 1.06 | 0.1104 | -0.1067 |
|       | 1 | 7 | 2.186 | 0.95 | 0.1067 | -0.0730 |
|       | 2 | 7 | 2.217 | 1.00 | 0.1073 | -0.0842 |
|       | 2 | 8 | 2.258 | 0.95 | 0.1016 | -0.0867 |
|       | 3 | 4 | 2.186 | 0.95 | 0.1067 | -0.0730 |
|       | 3 | 7 | 2.258 | 0.95 | 0.1016 | -0.0867 |
|       | 3 | 8 | 2.217 | 1.00 | 0.1073 | -0.0842 |
|       | 4 | 5 | 2.191 | 1.06 | 0.1104 | -0.1067 |
|       | 4 | 8 | 2.186 | 0.95 | 0.1067 | -0.0730 |
|       | 5 | 6 | 2.005 | 1.78 | 0.1484 | -0.2158 |
| P8-10 | 1 | 6 | 2.023 | 1.55 | 0.1436 | -0.1971 |
|       | 1 | 7 | 2.229 | 0.96 | 0.1024 | -0.0843 |
|       | 2 | 4 | 2.326 | 0.74 | 0.0908 | -0.0573 |
|       | 2 | 5 | 2.182 | 1.04 | 0.1119 | -0.0924 |
|       | 2 | 7 | 2.184 | 1.01 | 0.1100 | -0.0844 |
|       | 3 | 4 | 2.251 | 0.78 | 0.0963 | -0.0224 |
|       | 3 | 5 | 2.327 | 0.74 | 0.0907 | -0.0572 |
|       | 3 | 6 | 2.305 | 0.65 | 0.0887 | -0.0308 |
|       | 3 | 8 | 2.116 | 1.10 | 0.1176 | -0.0874 |
|       | 4 | 6 | 2.304 | 0.65 | 0.0888 | -0.0310 |
|       | 4 | 8 | 2.116 | 1.10 | 0.1176 | -0.0875 |

|       |   |   |       |      |        |         |
|-------|---|---|-------|------|--------|---------|
|       | 5 | 7 | 2.184 | 1.01 | 0.1100 | -0.0846 |
| P8-11 | 1 | 3 | 1.995 | 1.86 | 0.1492 | -0.1936 |
|       | 1 | 5 | 2.202 | 1.01 | 0.1072 | -0.0671 |
|       | 2 | 6 | 2.082 | 1.43 | 0.1319 | -0.1674 |
|       | 2 | 8 | 2.094 | 1.42 | 0.1295 | -0.1605 |
|       | 3 | 5 | 2.202 | 1.01 | 0.1072 | -0.0671 |
|       | 4 | 5 | 2.212 | 0.92 | 0.1105 | -0.1159 |
|       | 4 | 6 | 2.060 | 1.30 | 0.1343 | -0.1765 |
|       | 4 | 7 | 2.067 | 1.25 | 0.1323 | -0.1691 |
|       | 7 | 8 | 2.081 | 1.43 | 0.1318 | -0.1666 |
| P8-12 | 1 | 4 | 2.294 | 0.80 | 0.0976 | -0.0749 |
|       | 1 | 6 | 2.096 | 1.18 | 0.1249 | -0.1220 |
|       | 1 | 8 | 2.456 | 0.51 | 0.0706 | -0.0025 |
|       | 2 | 4 | 2.234 | 0.97 | 0.1085 | -0.1087 |
|       | 2 | 7 | 2.208 | 1.00 | 0.1078 | -0.0889 |
|       | 2 | 8 | 2.231 | 0.87 | 0.1048 | -0.0743 |
|       | 3 | 4 | 2.218 | 1.01 | 0.1117 | -0.1173 |
|       | 3 | 5 | 2.294 | 0.80 | 0.0976 | -0.0748 |
|       | 3 | 7 | 2.234 | 0.97 | 0.1085 | -0.1087 |
|       | 5 | 6 | 2.095 | 1.18 | 0.1250 | -0.1223 |
|       | 5 | 8 | 2.458 | 0.51 | 0.0705 | -0.0022 |
|       | 7 | 8 | 2.231 | 0.87 | 0.1048 | -0.0743 |
| P8-13 | 1 | 2 | 2.265 | 1.00 | 0.1053 | -0.1083 |
|       | 1 | 4 | 2.265 | 1.00 | 0.1053 | -0.1084 |
|       | 1 | 8 | 2.265 | 1.00 | 0.1053 | -0.1084 |
|       | 2 | 3 | 2.265 | 1.00 | 0.1053 | -0.1084 |
|       | 2 | 5 | 2.265 | 1.00 | 0.1053 | -0.1084 |
|       | 3 | 4 | 2.265 | 1.00 | 0.1053 | -0.1084 |
|       | 3 | 6 | 2.265 | 1.00 | 0.1053 | -0.1084 |
|       | 4 | 7 | 2.265 | 1.00 | 0.1053 | -0.1084 |
|       | 5 | 6 | 2.265 | 1.00 | 0.1053 | -0.1084 |
|       | 5 | 8 | 2.265 | 1.00 | 0.1053 | -0.1084 |
|       | 6 | 7 | 2.265 | 1.00 | 0.1053 | -0.1084 |
|       | 7 | 8 | 2.265 | 1.00 | 0.1053 | -0.1084 |

Table S6: Calculated molar magnetic susceptibility in cgs ppm units ( $10^{-6} \text{ cm}^3 \text{ mol}^{-1}$ ) at the (M11/def2-TZVP) level of theory, where for benzene ( $\text{C}_6\text{H}_6$ ) the experimental value is found to be  $-54.4 (10^{-6} \text{ cm}^3 \text{ mol}^{-1})^a$

| Structure | Calculated $\chi_M (10^{-6} \text{ cm}^3 \text{ mol}^{-1})$ |
|-----------|-------------------------------------------------------------|
| C6H6      | -52.4448                                                    |
| P8-1      | -119.9984                                                   |
| P8-2      | -121.0013                                                   |
| P8-3      | -107.6571                                                   |
| P8-4      | -189.8174                                                   |
| P8-5      | -136.2405                                                   |
| P8-6      | -182.8385                                                   |
| P8-7      | -111.5833                                                   |
| P8-8      | -109.6991                                                   |
| P8-9      | -152.4464                                                   |
| P8-10     | -156.8422                                                   |
| P8-11     | -112.8774                                                   |
| P8-12     | -118.7701                                                   |
| P8-13     | -2.0460                                                     |
| C8H8-1    | -38.8016                                                    |
| C8H8-2    | -51.6034                                                    |
| C8H8-3    | -84.0608                                                    |
| C8H8-4    | -68.5624                                                    |
| C8H8-5    | -76.2359                                                    |
| C8H8-6    | -60.5651                                                    |
| C8H8-7    | -77.2472                                                    |
| C8H8-8    | -74.5895                                                    |
| C8H8-9    | -55.8549                                                    |
| C8H8-10   | -57.9932                                                    |
| C8H8-11   | -80.2488                                                    |
| C8H8-12   | -46.6025                                                    |
| C8H8-13   | -71.7029                                                    |
| C8H8-14   | -88.0765                                                    |

<sup>a</sup>J. Dauben, J. D. Wilson and J. L. Laity, Diamagnetic Susceptibility Exaltation in Hydrocarbons. *J. Am. Chem. Soc.* 1969, 91, 8, 1991–1998.

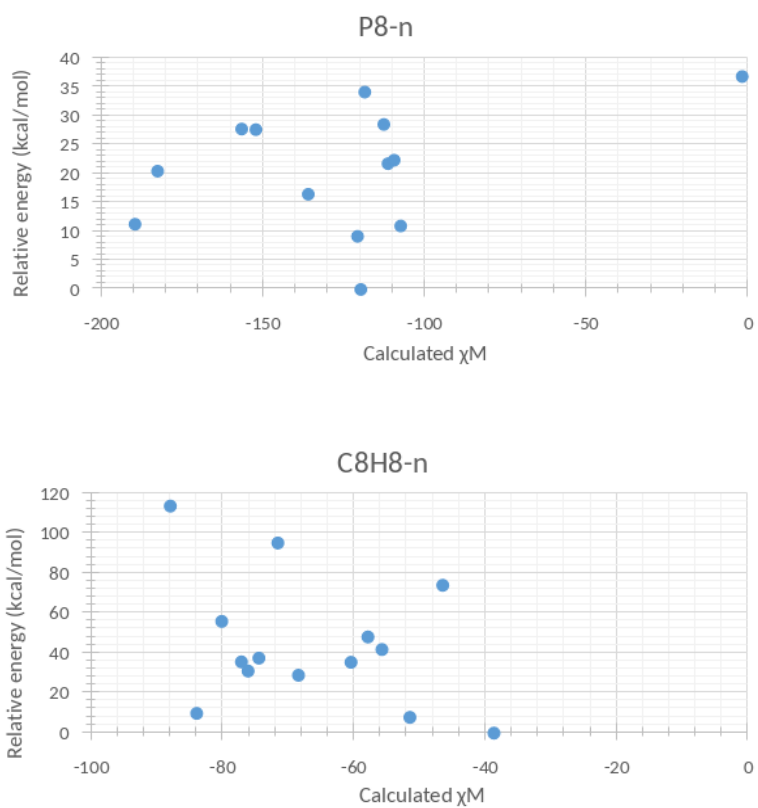

Figure S1. Correlation between the calculated  $\chi_M$  and relative energy (kcal/mol) for the  $P_8$  and  $C_8H_8$  structures.
